# Supplementary material
Source: PubMed Central journal article supplement (PMC4568498)
Supplement: supp_tpc.15.00051_TPC2015-00051-LSBR3_Merged_Supplemental_Data.pdf [file supp_tpc.15.00051_TPC2015-00051-LSBR3_Merged_Supplemental_Data.pdf]

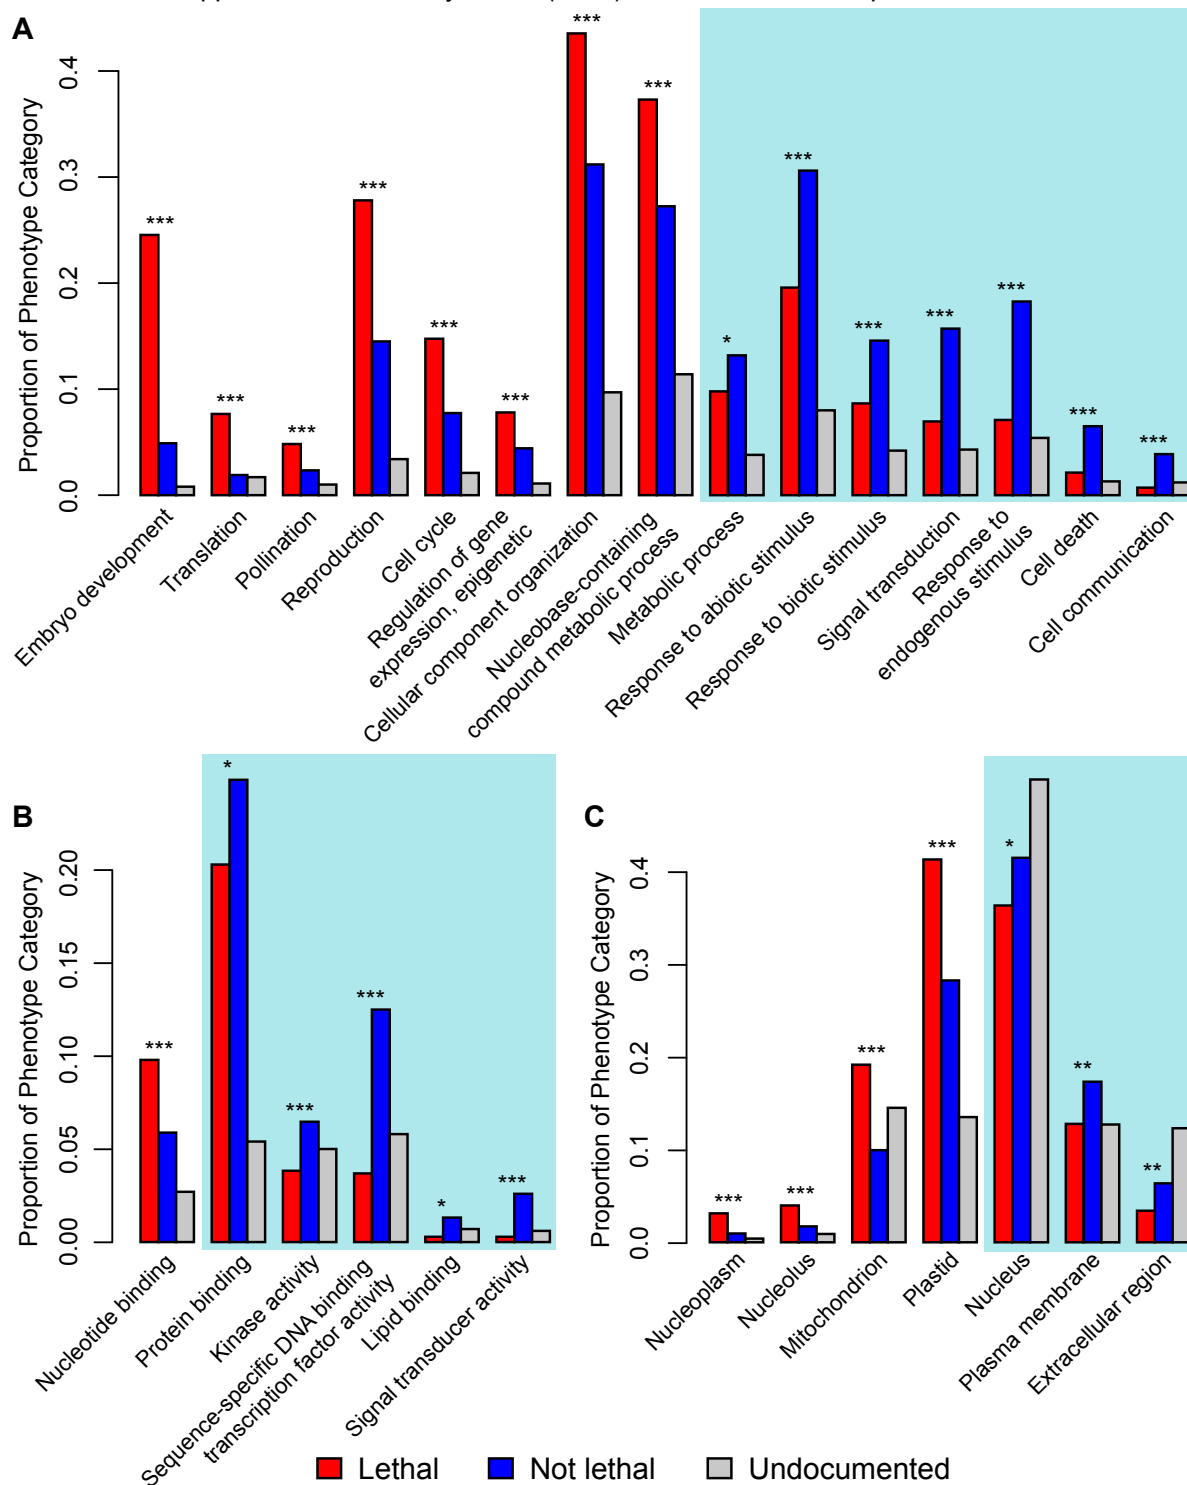

### Supplemental Figure 1. Over- and underrepresentation of phenotype genes in Gene Ontology categories

Proportions of lethal, non-lethal, and undocumented genes present in (A) biological processes, (B) molecular functions, or (C) cellular component categories. Only categories that have significantly over- or under-represented numbers of lethal genes relative to non-lethal genes are shown based on adjusted  $p$ -values of Fisher exact tests where \*, \*\*, and \*\*\* indicate  $\alpha = 0.05$ , 0.01, and 0.001, respectively. Categories in which lethal genes are underrepresented are indicated by a cyan background.

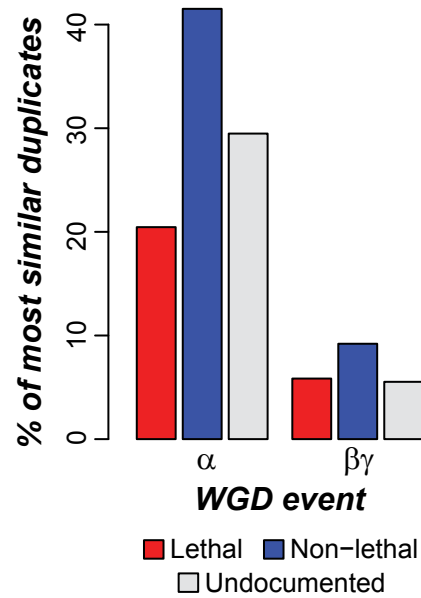

**Supplemental Figure 2. Proportions of most similar paralogs produced in whole genome duplication events.**

Proportion of lethal, non-lethal, and undocumented genes with close paralogs (most similar by BLASTP e-value) generated in the  $\alpha$  or  $\beta\gamma$  WGD events.

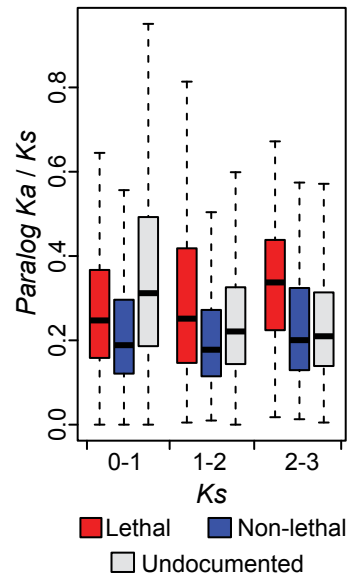

### Supplemental Figure 3. Evolutionary rates between paralogs.

Box plots of  $Ka/Ks$  values between paralogous pairs of lethal, non-lethal, or undocumented genes. Gene pairs are non-exclusive with regard to phenotype category. Distributions of ratios are shown as they relate to the rate of synonymous substitutions ( $Ks$ ) between a gene pair, where low  $Ks$  values indicate recent duplicates and high  $Ks$  values indicate older duplicates.

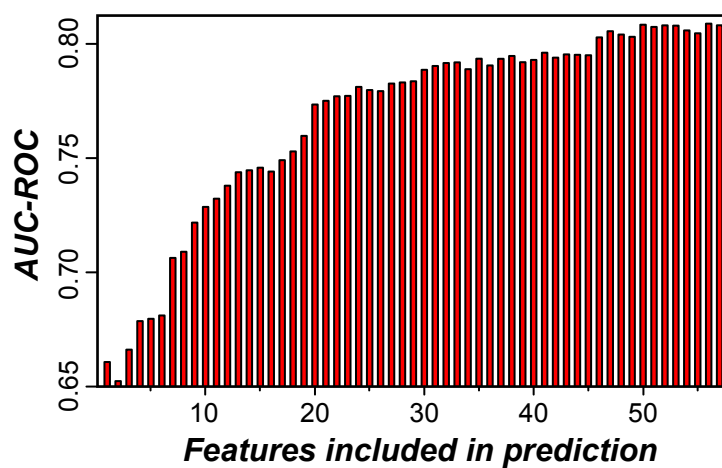

**Supplemental Figure 4. Performance of essential gene predictions with increasing numbers of features.**

AUC-ROCs of 57 Random Forest models using 1 to 57 features detailed in Table 1. Features were included in the order of highest-to-lowest absolute SVM weight.

1 **Supplemental Table 1. Sign, absolute weight, and rank of Support Vector Machine weights**  
 2 **for *A. thaliana* and *S. cerevisiae* features.**

| Feature                                                              | Atha sign <sup>1</sup> | Atha weight <sup>1</sup> | Atha rank | Scer sign <sup>1</sup> | Scer weight <sup>1</sup> | Scer rank | Signs agree |
|----------------------------------------------------------------------|------------------------|--------------------------|-----------|------------------------|--------------------------|-----------|-------------|
| Coexpression module size                                             | +                      | 0.9823                   | 1         | +                      | 0.3662                   | 20        | yes         |
| Core eukaryotic gene                                                 | +                      | 0.5404                   | 7         | +                      | 0.8895                   | 6         | yes         |
| Expression variation                                                 | -                      | 0.0321                   | 35        | -                      | 0.2745                   | 22        | yes         |
| Gene network interaction                                             | +                      | 0.5766                   | 6         | +                      | 0.6367                   | 12        | yes         |
| GOslim C Extracellular region                                        | -                      | 0.1828                   | 27        | -                      | 0.7235                   | 11        | yes         |
| GOslim C Mitochondrion                                               | +                      | 0.6244                   | 4         | -                      | 0.0727                   | 35        | no          |
| GOslim C Nucleolus                                                   | +                      | 0.195                    | 26        | +                      | 0.9202                   | 5         | yes         |
| GOslim C Nucleoplasm                                                 | +                      | 0.3                      | 14        | +                      | 0.3767                   | 19        | yes         |
| GOslim C Nucleus                                                     | -                      | 0.1953                   | 25        | +                      | 0.7825                   | 9         | no          |
| GOslim C Plasma membrane                                             | -                      | 0.1315                   | 30        | +                      | 0.3406                   | 21        | no          |
| GOslim F Kinase activity                                             | -                      | 0.2966                   | 15        | +                      | 0.2674                   | 23        | no          |
| GOslim F Lipid binding                                               | -                      | 0.2                      | 23        | +                      | 0.2107                   | 27        | no          |
| GOslim F Nucleotide binding                                          | +                      | 0.0539                   | 34        | +                      | 0.592                    | 14        | yes         |
| GOslim F Protein binding                                             | -                      | 0.1619                   | 28        | +                      | 0.1586                   | 32        | no          |
| GOslim F Sequence-specific DNA binding transcription factor activity | -                      | 0.2509                   | 17        | -                      | 0.6155                   | 13        | yes         |
| GOslim F Signal transducer activity                                  | -                      | 0.2                      | 24        | +                      | 0.7657                   | 10        | no          |
| GOslim P Cell communication                                          | -                      | 0.3                      | 13        | -                      | 0.2115                   | 26        | yes         |
| GOslim P Cell cycle                                                  | +                      | 0.2808                   | 16        | +                      | 0.8246                   | 8         | yes         |
| GOslim P Cell death                                                  | -                      | 0.1305                   | 31        | -                      | 0.1006                   | 34        | yes         |
| GOslim P Cellular component organization                             | +                      | 0.2337                   | 18        | +                      | 0.5538                   | 15        | yes         |
| GOslim P Metabolic process                                           | +                      | 0.0777                   | 33        | -                      | 0.1736                   | 30        | no          |
| GOslim P Nucleobase-containing compound metabolic process            | +                      | 0.135                    | 29        | +                      | 0.1748                   | 29        | yes         |
| GOslim P Regulation of gene expression, epigenetic                   | -                      | 0.2252                   | 21        | -                      | 0.9479                   | 4         | yes         |
| GOslim P Reproduction                                                | +                      | 0.4421                   | 9         | -                      | 1.2043                   | 2         | no          |
| GOslim P Response to abiotic stimulus                                | -                      | 0.3578                   | 11        | -                      | 1.1569                   | 3         | yes         |
| GOslim P Response to biotic stimulus                                 | -                      | 0.3827                   | 10        | +                      | 0.5                      | 16        | no          |
| GOslim P Response to endogenous stimulus                             | -                      | 0.1054                   | 32        | +                      | 0.5                      | 17        | no          |
| GOslim P Signal transduction                                         | -                      | 0.2259                   | 20        | -                      | 0.2613                   | 24        | yes         |
| GOslim P Translation                                                 | +                      | 0.4995                   | 8         | -                      | 0.1618                   | 31        | no          |
| Median expression                                                    | +                      | 0.3273                   | 12        | +                      | 1.4755                   | 1         | yes         |
| Number of protein domains                                            | +                      | 0.0296                   | 36        | -                      | 0.1034                   | 33        | no          |
| Paralog Ka/Ks                                                        | +                      | 0.6081                   | 5         | +                      | 0.8728                   | 7         | yes         |
| Paralog Ks                                                           | -                      | 0.2172                   | 22        | +                      | 0.4232                   | 18        | no          |
| Percent ID                                                           | -                      | 0.9598                   | 2         | -                      | 0.2095                   | 28        | yes         |
| Protein length                                                       | +                      | 0.227                    | 19        | -                      | 0.0232                   | 36        | no          |
| Single copy                                                          | +                      | 0.8883                   | 3         | +                      | 0.2251                   | 25        | yes         |

3  
 4 1. Sign and absolute weight of features given by Support Vector Machine analysis. Sign indicates the relationship between a  
 5 feature a lethality (a positive weight is related to phenotype lethality while a negative weight is related to non-lethality) and  
 6 weight indicates the importance of a feature to essential gene predictions, where a higher weight indicates greater importance.
